# Supplementary material
Source: publisher figshare collection journal article supplement (https://acs.figshare.com/ndownloader/files/3770269)
Supplement: Supplementary file 1 [file 3770269]

## Sheet: anova_pvalues_condition_sample1
miRNA	Raw p-value	Adjusted p-Value
hsa-miR-320b	4.70227e-07	0.000213483
hsa-miR-320a	4.20843e-06	0.000955314
hsa-miR-16-5p	0.000115896	0.0175389
hsa-miR-18b-5p	0.000396622	0.0370277
hsa-miR-375	0.000407795	0.0370277
hsa-miR-1254	0.000800735	0.0591919
hsa-miR-378i	0.00101421	0.0591919
hsa-miR-378c	0.00104303	0.0591919
hsa-miR-3613-5p	0.00207421	0.104632
hsa-miR-1180-3p	0.00295992	0.13438
hsa-miR-320c	0.00472314	0.194937
hsa-miR-20a-5p	0.0057413	0.217213
hsa-miR-196b-5p	0.00653976	0.228388
hsa-miR-3127-3p	0.00815343	0.264404
hsa-miR-15a-5p	0.0125559	0.373603
hsa-miR-345-5p	0.0131666	0.373603
hsa-miR-18a-5p	0.0150945	0.398923
hsa-miR-15b-5p	0.0158164	0.398923
hsa-miR-185-5p	0.0177132	0.409217
hsa-miR-744-5p	0.0181268	0.409217
hsa-miR-505-5p	0.0197016	0.409217
hsa-miR-96-5p	0.0207179	0.409217
hsa-miR-101-3p	0.0207313	0.409217
hsa-miR-660-5p	0.023917	0.445886
hsa-miR-1343-3p	0.0245532	0.445886
hsa-miR-4638-3p	0.0267546	0.467176
hsa-miR-6804-3p	0.0279193	0.469458
hsa-let-7b-3p	0.029083	0.471561
hsa-miR-4738-3p	0.0321293	0.486881
hsa-miR-423-5p	0.0325311	0.486881
hsa-miR-199b-3p	0.0332452	0.486881
hsa-let-7b-5p	0.0357362	0.490384
hsa-miR-374a-5p	0.0361439	0.490384
hsa-miR-7977	0.0367248	0.490384
hsa-miR-1976	0.0394619	0.505324
hsa-miR-324-3p	0.0403942	0.505324
hsa-miR-144-3p	0.0411828	0.505324
hsa-miR-32-5p	0.044761	0.531837
hsa-miR-199a-3p	0.0458019	0.531837
hsa-miR-361-3p	0.047102	0.531837
hsa-miR-664a-3p	0.0480293	0.531837
hsa-miR-106b-5p	0.0523276	0.535646
hsa-miR-374b-5p	0.0526524	0.535646
hsa-miR-6754-3p	0.0527216	0.535646
hsa-miR-126-5p	0.0548215	0.535646
hsa-miR-4732-5p	0.0551457	0.535646
hsa-miR-6842-3p	0.0554524	0.535646
hsa-miR-142-5p	0.0608457	0.550375
hsa-miR-1271-5p	0.0609433	0.550375
hsa-miR-576-5p	0.0615808	0.550375
hsa-let-7f-5p	0.0618263	0.550375
hsa-let-7a-5p	0.0682475	0.595853
hsa-miR-4448	0.070423	0.603246
hsa-miR-6798-3p	0.0754748	0.627467
hsa-let-7i-5p	0.0773864	0.627467
hsa-miR-589-5p	0.0773968	0.627467
hsa-miR-20b-5p	0.0796623	0.634504
hsa-miR-4745-3p	0.0818523	0.640706
hsa-miR-21-5p	0.0847707	0.651773
hsa-miR-629-3p	0.0862437	0.651773
hsa-miR-1296-5p	0.0887968	0.651773
hsa-miR-1287-5p	0.0924022	0.651773
hsa-miR-98-5p	0.0939189	0.651773
hsa-miR-128-1-5p	0.0961159	0.651773
hsa-miR-193a-5p	0.0964501	0.651773
hsa-miR-378a-3p	0.0967139	0.651773
hsa-miR-1270	0.0975185	0.651773
hsa-miR-196a-5p	0.0990853	0.651773
hsa-miR-28-5p	0.100995	0.651773
hsa-miR-151b	0.102106	0.651773
hsa-miR-10b-5p	0.104804	0.651773
hsa-miR-126-3p	0.105563	0.651773
hsa-miR-4685-3p	0.10772	0.651773
hsa-miR-5581-3p	0.108511	0.651773
hsa-miR-3605-3p	0.109792	0.651773
hsa-miR-625-5p	0.110141	0.651773
hsa-let-7g-5p	0.111542	0.651773
hsa-miR-3913-5p	0.111979	0.651773
hsa-miR-320d	0.11536	0.656157
hsa-miR-6862-3p	0.115858	0.656157
hsa-miR-30d-3p	0.117068	0.656157
hsa-miR-629-5p	0.119707	0.662768
hsa-miR-10a-5p	0.126194	0.690265
hsa-miR-3074-5p	0.127803	0.690745
hsa-miR-130b-3p	0.134423	0.711563
hsa-miR-4659a-3p	0.134789	0.711563
hsa-miR-4662a-5p	0.137167	0.715791
hsa-miR-5100	0.142064	0.732919
hsa-miR-30e-5p	0.150732	0.765379
hsa-miR-194-5p	0.153577	0.765379
hsa-miR-99b-5p	0.154217	0.765379
hsa-miR-323b-3p	0.155099	0.765379
hsa-miR-152-3p	0.15844	0.773461
hsa-let-7c-5p	0.163214	0.788288
hsa-miR-627-5p	0.170408	0.808637
hsa-miR-423-3p	0.173207	0.808637
hsa-miR-6857-3p	0.173783	0.808637
hsa-miR-142-3p	0.179721	0.808637
hsa-let-7d-5p	0.180239	0.808637
hsa-miR-320e	0.181308	0.808637
hsa-miR-1304-3p	0.183928	0.808637
hsa-miR-16-2-3p	0.184104	0.808637
hsa-miR-365b-3p	0.185238	0.808637
hsa-miR-365a-3p	0.185238	0.808637
hsa-miR-425-5p	0.18891	0.811594
hsa-miR-425-3p	0.189491	0.811594
hsa-miR-4661-5p	0.192337	0.816085
hsa-miR-431-5p	0.198305	0.83218
hsa-miR-550a-3-5p	0.199797	0.83218
hsa-miR-197-3p	0.208488	0.854223
hsa-miR-4301	0.208852	0.854223
hsa-miR-335-3p	0.219515	0.889819
hsa-miR-6817-3p	0.224626	0.902478
hsa-miR-1468-5p	0.229904	0.915581
hsa-miR-93-3p	0.234498	0.920373
hsa-miR-7-1-3p	0.235723	0.920373
hsa-let-7e-5p	0.237473	0.920373
hsa-miR-6501-5p	0.239216	0.920373
hsa-miR-574-3p	0.24358	0.929287
hsa-miR-7855-5p	0.248371	0.939671
hsa-miR-5701	0.250844	0.941182
hsa-miR-6818-3p	0.261895	0.961971
hsa-miR-25-5p	0.262956	0.961971
hsa-miR-181c-3p	0.264068	0.961971
hsa-miR-4687-5p	0.269355	0.961971
hsa-miR-548av-5p	0.27076	0.961971
hsa-miR-548k	0.27076	0.961971
hsa-miR-1273h-3p	0.271216	0.961971
hsa-miR-22-3p	0.275022	0.967907
hsa-miR-6726-3p	0.279958	0.971258
hsa-miR-550a-5p	0.280253	0.971258
hsa-miR-17-5p	0.283626	0.975501
hsa-let-7f-1-3p	0.286453	0.977818
hsa-miR-193b-3p	0.288675	0.978048
hsa-miR-125a-5p	0.294063	0.988924
hsa-let-7a-3p	0.300108	0.999283
hsa-miR-6131	0.303016	0.999283
hsa-miR-6503-3p	0.304404	0.999283
hsa-miR-6859-3p	0.306558	0.999283
hsa-miR-26b-3p	0.31054	0.999283
hsa-miR-181a-5p	0.314777	0.999283
hsa-miR-93-5p	0.322359	0.999283
hsa-miR-6868-3p	0.329435	0.999283
hsa-miR-7-5p	0.331445	0.999283
hsa-miR-6799-3p	0.332889	0.999283
hsa-miR-6505-3p	0.3397	0.999283
hsa-miR-378a-5p	0.34297	0.999283
hsa-miR-6511b-5p	0.347809	0.999283
hsa-miR-3158-3p	0.349664	0.999283
hsa-miR-532-5p	0.350247	0.999283
hsa-miR-30b-5p	0.350388	0.999283
hsa-miR-4511	0.350951	0.999283
hsa-miR-27a-3p	0.350959	0.999283
hsa-miR-340-3p	0.352227	0.999283
hsa-miR-1249-3p	0.352373	0.999283
hsa-miR-17-3p	0.352971	0.999283
hsa-miR-548o-5p	0.358854	0.999283
hsa-miR-584-5p	0.363359	0.999283
hsa-miR-371b-5p	0.365984	0.999283
hsa-miR-190a-5p	0.366762	0.999283
hsa-miR-25-3p	0.374347	0.999283
hsa-miR-330-3p	0.374508	0.999283
hsa-miR-636	0.37586	0.999283
hsa-miR-454-3p	0.387793	0.999283
hsa-miR-192-5p	0.388656	0.999283
hsa-miR-548am-5p	0.388912	0.999283
hsa-miR-548au-5p	0.388912	0.999283
hsa-miR-548c-5p	0.388912	0.999283
hsa-miR-335-5p	0.389311	0.999283
hsa-miR-4659b-3p	0.389526	0.999283
hsa-miR-27b-3p	0.390241	0.999283
hsa-miR-1292-5p	0.395886	0.999283
hsa-miR-3688-3p	0.396408	0.999283
hsa-miR-129-2-3p	0.398142	0.999283
hsa-miR-6820-3p	0.400895	0.999283
hsa-miR-505-3p	0.401224	0.999283
hsa-miR-30c-5p	0.402881	0.999283
hsa-miR-7976	0.405437	0.999283
hsa-miR-550b-3p	0.405931	0.999283
hsa-miR-3176	0.410882	0.999283
hsa-miR-3607-5p	0.41526	0.999283
hsa-miR-3609	0.416695	0.999283
hsa-miR-15b-3p	0.417152	0.999283
hsa-miR-548h-5p	0.417946	0.999283
hsa-miR-6793-3p	0.419626	0.999283
hsa-miR-6762-3p	0.419889	0.999283
hsa-miR-3613-3p	0.420428	0.999283
hsa-miR-874-5p	0.423175	0.999283
hsa-miR-491-5p	0.423185	0.999283
hsa-miR-424-3p	0.425434	0.999283
hsa-miR-215-5p	0.433054	0.999283
hsa-miR-548ar-5p	0.43424	0.999283
hsa-miR-548aj-5p	0.43424	0.999283
hsa-miR-7706	0.435232	0.999283
hsa-miR-548g-5p	0.437276	0.999283
hsa-miR-548x-5p	0.437276	0.999283
hsa-miR-26a-5p	0.437533	0.999283
hsa-miR-151a-5p	0.438804	0.999283
hsa-miR-6511b-3p	0.443401	0.999283
hsa-miR-4762-5p	0.449383	0.999283
hsa-miR-941	0.449789	0.999283
hsa-miR-219a-1-3p	0.449843	0.999283
hsa-miR-451a	0.451555	0.999283
hsa-miR-92a-3p	0.451555	0.999283
hsa-miR-3944-5p	0.45575	0.999283
hsa-miR-129-1-3p	0.457982	0.999283
hsa-miR-134-5p	0.459216	0.999283
hsa-miR-758-3p	0.460513	0.999283
hsa-miR-548f-5p	0.461419	0.999283
hsa-miR-30d-5p	0.470365	0.999283
hsa-miR-502-5p	0.477566	0.999283
hsa-miR-616-5p	0.478202	0.999283
hsa-miR-4746-5p	0.479551	0.999283
hsa-miR-4473	0.489288	0.999283
hsa-miR-6782-3p	0.493364	0.999283
hsa-miR-5094	0.498824	0.999283
hsa-miR-4482-3p	0.507435	0.999283
hsa-miR-181a-3p	0.519087	0.999283
hsa-miR-29b-2-5p	0.520638	0.999283
hsa-miR-501-3p	0.523645	0.999283
hsa-miR-200b-3p	0.526089	0.999283
hsa-miR-5000-3p	0.526841	0.999283
hsa-miR-3960	0.527658	0.999283
hsa-miR-3173-5p	0.530075	0.999283
hsa-miR-1260b	0.531412	0.999283
hsa-miR-4454	0.532464	0.999283
hsa-miR-4753-5p	0.532649	0.999283
hsa-miR-181d-5p	0.534715	0.999283
hsa-miR-3656	0.535551	0.999283
hsa-miR-18b-3p	0.537249	0.999283
hsa-miR-6509-3p	0.538093	0.999283
hsa-miR-3163	0.539132	0.999283
hsa-miR-5690	0.53968	0.999283
hsa-miR-4757-3p	0.540448	0.999283
hsa-miR-3939	0.541276	0.999283
hsa-miR-221-3p	0.542625	0.999283
hsa-miR-29c-5p	0.550224	0.999283
hsa-miR-744-3p	0.550391	0.999283
hsa-miR-1307-3p	0.551717	0.999283
hsa-miR-6741-3p	0.552452	0.999283
hsa-miR-144-5p	0.554705	0.999283
hsa-miR-628-5p	0.557206	0.999283
hsa-miR-30a-5p	0.56292	0.999283
hsa-miR-106a-5p	0.568421	0.999283
hsa-miR-191-5p	0.570421	0.999283
hsa-miR-3133	0.570452	0.999283
hsa-miR-106b-3p	0.572955	0.999283
hsa-miR-223-5p	0.573471	0.999283
hsa-miR-6747-3p	0.574755	0.999283
hsa-miR-1538	0.577811	0.999283
hsa-miR-181b-5p	0.578626	0.999283
hsa-miR-150-3p	0.578904	0.999283
hsa-miR-6882-3p	0.580417	0.999283
hsa-miR-550a-3p	0.581771	0.999283
hsa-miR-502-3p	0.58424	0.999283
hsa-miR-548ay-3p	0.588069	0.999283
hsa-miR-143-3p	0.589198	0.999283
hsa-miR-3615	0.591235	0.999283
hsa-miR-1260a	0.599234	0.999283
hsa-miR-6737-3p	0.612057	0.999283
hsa-miR-579-5p	0.615592	0.999283
hsa-miR-23c	0.617512	0.999283
hsa-miR-148a-5p	0.618967	0.999283
hsa-miR-548e-3p	0.621044	0.999283
hsa-miR-671-3p	0.625183	0.999283
hsa-miR-23b-3p	0.629355	0.999283
hsa-miR-210-3p	0.639924	0.999283
hsa-miR-454-5p	0.640788	0.999283
hsa-miR-500a-5p	0.644647	0.999283
hsa-miR-6802-3p	0.645657	0.999283
hsa-miR-4742-3p	0.649186	0.999283
hsa-miR-103a-2-5p	0.65006	0.999283
hsa-miR-627-3p	0.651526	0.999283
hsa-miR-199a-5p	0.651979	0.999283
hsa-miR-6730-3p	0.653423	0.999283
hsa-miR-6775-3p	0.656042	0.999283
hsa-miR-3200-3p	0.656853	0.999283
hsa-miR-664b-3p	0.6577	0.999283
hsa-miR-24-3p	0.659606	0.999283
hsa-miR-1255a	0.66026	0.999283
hsa-miR-3150a-5p	0.660766	0.999283
hsa-miR-381-3p	0.660964	0.999283
hsa-miR-331-3p	0.661445	0.999283
hsa-miR-5096	0.665059	0.999283
hsa-miR-4433b-5p	0.665501	0.999283
hsa-miR-326	0.666214	0.999283
hsa-miR-6734-3p	0.669891	0.999283
hsa-miR-6859-5p	0.676121	0.999283
hsa-miR-30e-3p	0.678838	0.999283
hsa-miR-664a-5p	0.682633	0.999283
hsa-let-7f-2-3p	0.68276	0.999283
hsa-miR-18a-3p	0.687242	0.999283
hsa-miR-363-3p	0.691367	0.999283
hsa-miR-641	0.69316	0.999283
hsa-miR-548ac	0.694375	0.999283
hsa-miR-342-5p	0.694867	0.999283
hsa-miR-877-5p	0.696342	0.999283
hsa-miR-1284	0.696956	0.999283
hsa-miR-6513-3p	0.699121	0.999283
hsa-miR-128-3p	0.699802	0.999283
hsa-miR-6783-5p	0.700073	0.999283
hsa-miR-3614-5p	0.700592	0.999283
hsa-miR-23a-3p	0.701592	0.999283
hsa-miR-181c-5p	0.702015	0.999283
hsa-miR-127-3p	0.702417	0.999283
hsa-miR-1285-5p	0.704203	0.999283
hsa-miR-1307-5p	0.708994	0.999283
hsa-miR-324-5p	0.711544	0.999283
hsa-miR-1291	0.712494	0.999283
hsa-miR-769-5p	0.716928	0.999283
hsa-miR-339-3p	0.71999	0.999283
hsa-miR-139-5p	0.726374	0.999283
hsa-miR-130b-5p	0.727792	0.999283
hsa-miR-22-5p	0.728626	0.999283
hsa-miR-223-3p	0.729546	0.999283
hsa-miR-942-5p	0.733316	0.999283
hsa-miR-410-3p	0.734578	0.999283
hsa-miR-7975	0.743328	0.999283
hsa-miR-4677-3p	0.743505	0.999283
hsa-miR-150-5p	0.745624	0.999283
hsa-miR-26b-5p	0.747999	0.999283
hsa-miR-3667-3p	0.750598	0.999283
hsa-miR-19b-3p	0.752814	0.999283
hsa-miR-659-5p	0.7536	0.999283
hsa-miR-145-5p	0.754002	0.999283
hsa-miR-937-3p	0.754049	0.999283
hsa-miR-3605-5p	0.754461	0.999283
hsa-miR-323a-3p	0.75472	0.999283
hsa-miR-140-5p	0.75668	0.999283
hsa-miR-151a-3p	0.758761	0.999283
hsa-miR-6750-3p	0.75989	0.999283
hsa-miR-339-5p	0.762357	0.999283
hsa-miR-500b-5p	0.763891	0.999283
hsa-miR-652-3p	0.766648	0.999283
hsa-miR-140-3p	0.767966	0.999283
hsa-miR-654-3p	0.7684	0.999283
hsa-miR-328-3p	0.770006	0.999283
hsa-miR-4672	0.770769	0.999283
hsa-miR-500a-3p	0.775407	0.999283
hsa-miR-5006-3p	0.781547	0.999283
hsa-miR-130a-3p	0.783601	0.999283
hsa-miR-874-3p	0.788922	0.999283
hsa-miR-3909	0.790624	0.999283
hsa-miR-503-5p	0.791842	0.999283
hsa-miR-484	0.794202	0.999283
hsa-miR-6511a-3p	0.794475	0.999283
hsa-miR-4755-5p	0.794959	0.999283
hsa-miR-181a-2-3p	0.799602	0.999283
hsa-miR-2110	0.800718	0.999283
hsa-miR-3940-3p	0.802303	0.999283
hsa-miR-4732-3p	0.805992	0.999283
hsa-miR-183-3p	0.806313	0.999283
hsa-miR-361-5p	0.80669	0.999283
hsa-miR-6743-3p	0.80736	0.999283
hsa-miR-6803-3p	0.808958	0.999283
hsa-miR-532-3p	0.809483	0.999283
hsa-miR-92b-3p	0.818643	0.999283
hsa-miR-19a-3p	0.827037	0.999283
hsa-miR-3143	0.827415	0.999283
hsa-miR-548t-3p	0.828366	0.999283
hsa-miR-548aa	0.828366	0.999283
hsa-miR-584-3p	0.82922	0.999283
hsa-miR-766-3p	0.82965	0.999283
hsa-miR-6894-3p	0.831924	0.999283
hsa-miR-1273a	0.832285	0.999283
hsa-miR-485-3p	0.835803	0.999283
hsa-miR-146b-5p	0.840774	0.999283
hsa-miR-501-5p	0.842428	0.999283
hsa-miR-29c-3p	0.843168	0.999283
hsa-miR-6881-3p	0.843351	0.999283
hsa-miR-204-5p	0.846738	0.999283
hsa-miR-4286	0.848237	0.999283
hsa-miR-3130-5p	0.84947	0.999283
hsa-miR-199b-5p	0.849491	0.999283
hsa-miR-625-3p	0.850533	0.999283
hsa-miR-4707-3p	0.851519	0.999283
hsa-miR-340-5p	0.851933	0.999283
hsa-miR-331-5p	0.854197	0.999283
hsa-let-7i-3p	0.855212	0.999283
hsa-miR-370-3p	0.857667	0.999283
hsa-miR-1285-3p	0.859212	0.999283
hsa-miR-30c-1-3p	0.85964	0.999283
hsa-miR-1226-3p	0.861041	0.999283
hsa-miR-183-5p	0.862185	0.999283
hsa-miR-186-5p	0.878413	0.999283
hsa-miR-148a-3p	0.87854	0.999283
hsa-miR-200c-3p	0.881765	0.999283
hsa-miR-5189-3p	0.887122	0.999283
hsa-miR-30a-3p	0.889481	0.999283
hsa-miR-3620-3p	0.890661	0.999283
hsa-miR-5695	0.892785	0.999283
hsa-miR-210-5p	0.894745	0.999283
hsa-miR-548p	0.895123	0.999283
hsa-miR-132-3p	0.897991	0.999283
hsa-miR-618	0.898569	0.999283
hsa-miR-362-5p	0.900715	0.999283
hsa-miR-1303	0.900768	0.999283
hsa-miR-1233-3p	0.903718	0.999283
hsa-miR-6837-3p	0.904695	0.999283
hsa-miR-4508	0.905787	0.999283
hsa-miR-943	0.906514	0.999283
hsa-miR-6749-3p	0.90828	0.999283
hsa-miR-7641	0.90986	0.999283
hsa-miR-296-5p	0.915258	0.999283
hsa-miR-548ah-3p	0.916381	0.999283
hsa-miR-330-5p	0.918922	0.999283
hsa-miR-548z	0.926493	0.999283
hsa-miR-548h-3p	0.926493	0.999283
hsa-miR-3691-5p	0.926636	0.999283
hsa-miR-582-3p	0.927808	0.999283
hsa-let-7d-3p	0.92795	0.999283
hsa-miR-548av-3p	0.928853	0.999283
hsa-miR-6833-3p	0.929128	0.999283
hsa-miR-5001-3p	0.931654	0.999283
hsa-miR-548o-3p	0.936611	0.999283
hsa-miR-6738-3p	0.940244	0.999283
hsa-miR-148b-5p	0.943362	0.999283
hsa-miR-6735-3p	0.946053	0.999283
hsa-miR-548s	0.950611	0.999283
hsa-miR-3200-5p	0.950945	0.999283
hsa-miR-548am-3p	0.952054	0.999283
hsa-miR-421	0.952987	0.999283
hsa-miR-222-3p	0.9542	0.999283
hsa-miR-107	0.964449	0.999283
hsa-miR-21-3p	0.964725	0.999283
hsa-miR-155-5p	0.966766	0.999283
hsa-miR-1234-3p	0.971976	0.999283
hsa-miR-182-5p	0.972141	0.999283
hsa-miR-146a-5p	0.97246	0.999283
hsa-miR-342-3p	0.975862	0.999283
hsa-miR-494-3p	0.978148	0.999283
hsa-miR-1229-3p	0.978469	0.999283
hsa-miR-148b-3p	0.979847	0.999283
hsa-miR-29a-3p	0.979862	0.999283
hsa-miR-4435	0.981237	0.999283
hsa-miR-1301-3p	0.981659	0.999283
hsa-miR-5010-3p	0.98197	0.999283
hsa-miR-146b-3p	0.982551	0.999283
hsa-miR-24-2-5p	0.983971	0.999283
hsa-miR-133a-3p	0.989174	0.999283
hsa-miR-6840-5p	0.989844	0.999283
hsa-miR-1255b-5p	0.991698	0.999283
hsa-miR-409-3p	0.992703	0.999283
hsa-miR-6777-3p	0.993046	0.999283
hsa-miR-1306-5p	0.99347	0.999283
hsa-miR-103a-3p	0.993903	0.999283
hsa-miR-28-3p	0.994271	0.999283
hsa-miR-4326	0.994348	0.999283
hsa-miR-3157-3p	0.994637	0.999283
hsa-miR-589-3p	0.995828	0.999283
hsa-miR-6786-3p	0.997935	0.999283
hsa-miR-125b-5p	0.998074	0.999283
hsa-miR-99a-5p	0.998696	0.999283
hsa-miR-100-5p	0.999283	0.999283
hsa-miR-486-5p	NaN	NaN
